# Supplementary material
Source: MDPI journal article supplement (https://www.mdpi.com/2072-4292/14/13/3182)

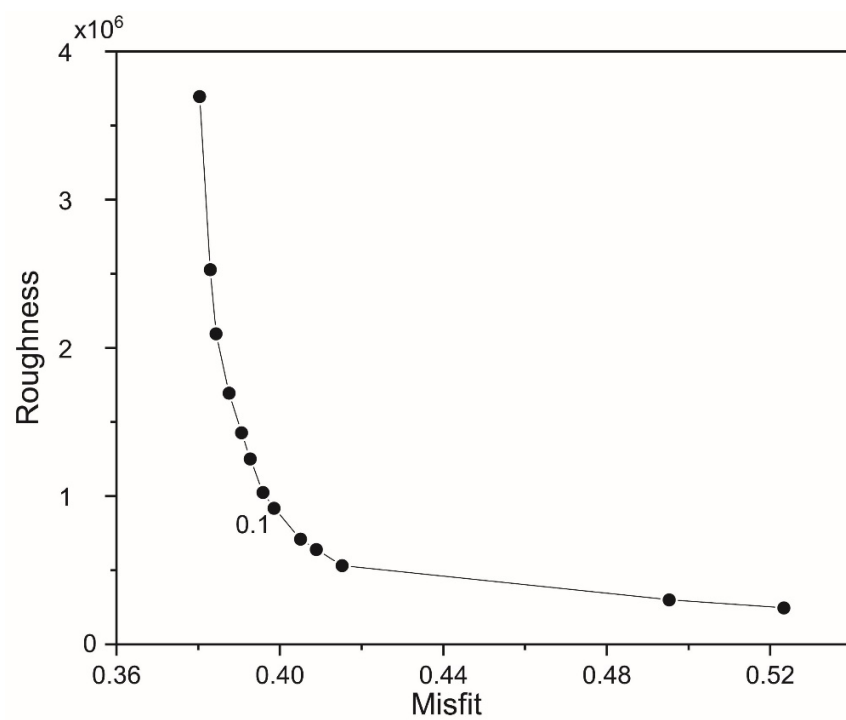

**Figure S1.** Trade-off curve between roughness and misfit.

Supplement: s1 [file s1 › remotesensing-1765671-supplementary.pdf]
